# Supplementary material for: Discriminating fluvial fans and deltas: Channel network morphometrics reflect distinct formative processes
Source: Copernicus journal article supplement (doi:10.5194/egusphere-2025-2497), 2025-07-10

## Supplemental Information

### Discriminating fluvial fans and deltas: Channel network morphometrics reflect distinct formative processes

#### **Authors**

Luke Gezovich<sup>1</sup>, Piret Plink-Björklund<sup>1</sup>, Jack Henry<sup>2</sup>

<sup>1</sup>Colorado School of Mines, Geology & Geologic Engineering, 1500 Illinois Street, Golden, CO, 80401

<sup>2</sup>Rice University, Earth, Environmental and Planetary Sciences, 6100 Main St., Houston, TX, 77005-182

## Supplemental Information

### Table of Contents

|                                                                                                                                                                                                                                                                                          |   |
|------------------------------------------------------------------------------------------------------------------------------------------------------------------------------------------------------------------------------------------------------------------------------------------|---|
| Supplementary Table 1: Statistics Results .....                                                                                                                                                                                                                                          | 3 |
| Supplementary Figure 1: Average network angle and length of landform. ....                                                                                                                                                                                                               | 5 |
| Supplementary Figure 2: Average network angle and slope for fluvial fans. ....                                                                                                                                                                                                           | 5 |
| Supplementary Figure 3: Normalized channel widths and lengths by order for deltas grouped by process regime and fluvial fans grouped by termination type. ....                                                                                                                           | 6 |
| Supplementary Figure 4: Comparison of local angle measurement ( $\theta_l = 102^\circ$ ) against channel reach-scale angle measurement ( $\theta_r = 42^\circ$ ). Base imagery from Esri's World Imagery basemap (© Esri, Maxar, Earthstar Geographics, and the GIS User Community)..... | 7 |

Supplemental Information

Supplementary Table 1: Statistics Results

|                                   |                               | Normality                         |                                              | Variations     | Means                                              |          |
|-----------------------------------|-------------------------------|-----------------------------------|----------------------------------------------|----------------|----------------------------------------------------|----------|
|                                   |                               | Shapiro-Wilk                      | Kolmogorov-Smirnov                           | Levene's Test  | Independent samples, Welch's, or One-sample T-test |          |
| Interpretation                    |                               | p = 0; Non-normal                 |                                              | p = 0; Unequal | p = 0; Different                                   |          |
| Angles                            | Deltas                        | Delta                             | p = 0                                        | p = 0          | p > 0.05                                           | p = 0    |
|                                   |                               | Fluvial fan                       | p = 0                                        | p = 0          |                                                    |          |
|                                   | Deltas                        | River-dominated                   | p = 0                                        | p = 0          | p > 0.05                                           | p > 0.05 |
|                                   |                               | Tide-influenced                   | p = 0                                        | p = 0          |                                                    |          |
|                                   |                               | Wave-influenced                   | Omitted due to low sample size (n = 14 < 30) |                |                                                    |          |
|                                   |                               | Non-arctic                        | p = 0                                        | p = 0          | p > 0.05                                           | p = 0    |
|                                   |                               | Arctic                            | p = 0                                        | p = 0          |                                                    |          |
|                                   |                               | Lake                              | p = 0                                        | p = 0          | p > 0.05                                           | p > 0.05 |
|                                   |                               | Ocean                             | p = 0                                        | p = 0          |                                                    |          |
|                                   |                               | Fluvial Fans                      | Lake                                         | p = 0          | p > 0.05                                           | p > 0.05 |
|                                   | Contributory                  |                                   | p = 0                                        | p > 0.05       | p > 0.05                                           | p > 0.05 |
|                                   | Marine                        |                                   | p = 0                                        | p > 0.05       | p > 0.05                                           | p > 0.05 |
|                                   | Axial                         |                                   | p > 0.05                                     | p > 0.05       | p = 0                                              | p = 0    |
|                                   | Dunes/Desert                  |                                   | p > 0.05                                     | p > 0.05       | p > 0.05                                           | p > 0.05 |
|                                   | Playa                         |                                   | p = 0                                        | p > 0.05       | p = 0                                              | p > 0.05 |
|                                   | Wetlands                      |                                   | p = 0                                        | p > 0.05       | p > 0.05                                           | p > 0.05 |
| Lengths                           | Delta                         | Delta                             | p = 0                                        | p = 0          | p = 0                                              | p = 0    |
|                                   |                               | Fluvial fan                       | p = 0                                        | p = 0          |                                                    |          |
|                                   | Delta Type                    | River-dominated                   | p = 0                                        | p = 0          | p > 0.05                                           | p > 0.05 |
|                                   |                               | Tide-influenced                   | p = 0                                        | p = 0          | p > 0.05                                           | p > 0.05 |
|                                   |                               | Wave-influenced                   | p = 0                                        | p = 0          | p > 0.05                                           | p > 0.05 |
|                                   |                               |                                   |                                              |                |                                                    |          |
|                                   | Fluvial Fan Termination Style | Axial                             | p = 0                                        | p = 0          | p = 0                                              | p = 0    |
|                                   |                               | Contributory                      | p = 0                                        | p = 0          | p > 0.05                                           | p > 0.05 |
|                                   |                               | Dunes/Desert                      | p = 0                                        | p = 0          | p = 0                                              | p = 0    |
|                                   |                               | Lake                              | p = 0                                        | p = 0          | p > 0.05                                           | p > 0.05 |
|                                   |                               | Marine                            | p = 0                                        | p = 0          | p = 0                                              | p = 0    |
|                                   |                               | Playa                             | p = 0                                        | p = 0          | p > 0.05                                           | p = 0    |
|                                   |                               | Wetlands                          | p = 0                                        | p = 0          | p = 0                                              | p = 0    |
|                                   |                               |                                   |                                              |                |                                                    |          |
|                                   | Order                         | 1 <sup>st</sup> order delta       | p = 0                                        | p > 0.05       | p = 0                                              | p = 0    |
|                                   |                               | 1 <sup>st</sup> order fluvial fan | p = 0                                        | p = 0          |                                                    |          |
|                                   |                               | 2 <sup>nd</sup> order delta       | p = 0                                        | p = 0          | p = 0                                              | p = 0    |
|                                   |                               | 2 <sup>nd</sup> order fluvial fan | p = 0                                        | p = 0          |                                                    |          |
|                                   |                               | 3 <sup>rd</sup> order delta       | p = 0                                        | p = 0          | p = 0                                              | p = 0    |
|                                   |                               | 3 <sup>rd</sup> order fluvial fan | p = 0                                        | p = 0          |                                                    |          |
|                                   |                               | 4 <sup>th</sup> order delta       | p = 0                                        | p = 0          | p = 0                                              | p = 0    |
|                                   |                               | 4 <sup>th</sup> order fluvial fan | p = 0                                        | p = 0          |                                                    |          |
| 5 <sup>th</sup> order delta       |                               | p = 0                             | p = 0                                        | p = 0          | p = 0                                              |          |
| 5 <sup>th</sup> order fluvial fan |                               | p = 0                             | p = 0                                        |                |                                                    |          |
| 6 <sup>th</sup> order delta       |                               | p = 0                             | p = 0                                        | p = 0          | p > 0.05                                           |          |
| 6 <sup>th</sup> order fluvial fan |                               | p = 0                             | p = 0                                        |                |                                                    |          |

Supplemental Information

|                                    |                                                       |                                                        |          |          |          |          |
|------------------------------------|-------------------------------------------------------|--------------------------------------------------------|----------|----------|----------|----------|
|                                    | 7 <sup>th</sup> order delta                           | p = 0                                                  | p = 0    | p > 0.05 | p > 0.05 |          |
|                                    | 7 <sup>th</sup> order fluvial fan                     | p = 0                                                  | p = 0    |          |          |          |
|                                    | 8 <sup>th</sup> order delta                           | p = 0                                                  | p = 0    | p = 0    | p = 0    |          |
|                                    | 8 <sup>th</sup> order fluvial fan                     | p = 0                                                  | p = 0    |          |          |          |
|                                    | 9 <sup>th</sup> order delta                           | p = 0                                                  | p = 0    | p > 0.05 | p > 0.05 |          |
|                                    | 9 <sup>th</sup> order fluvial fan                     | p = 0                                                  | p = 0    |          |          |          |
|                                    | 10 <sup>th</sup> order delta                          | <i>Omitted due to low sample size (n = 15 &lt; 30)</i> |          |          |          |          |
|                                    | 10 <sup>th</sup> order fluvial fan                    | <i>Omitted due to low sample size (n = 13 &lt; 30)</i> |          |          |          |          |
|                                    | 11 <sup>th</sup> order delta                          | <i>Omitted due to low sample size (n = 6 &lt; 30)</i>  |          |          |          |          |
|                                    | 11 <sup>th</sup> order fluvial fan                    | <i>Omitted due to lack of recorded data.</i>           |          |          |          |          |
| Widths                             | Delta widths                                          | p = 0                                                  | p = 0    | p = 0    | p = 0    |          |
|                                    | Fluvial fan widths                                    | p = 0                                                  | p = 0    |          |          |          |
|                                    | Delta Type                                            | River-dominated                                        | p = 0    | p = 0    | p > 0.05 | p > 0.05 |
|                                    |                                                       | Tide-influenced                                        | p = 0    | p = 0    | p > 0.05 | p = 0    |
|                                    |                                                       | Wave-influenced                                        | p = 0    | p = 0    | p > 0.05 | p = 0    |
|                                    | Fluvial Fan Termination Style                         | Axial                                                  | p = 0    | p = 0    | p > 0.05 | p = 0    |
|                                    |                                                       | Contributory                                           | p = 0    | p = 0    | p > 0.05 | p > 0.05 |
|                                    |                                                       | Dunes/Desert                                           | p = 0    | p = 0    | p = 0    | p = 0    |
|                                    |                                                       | Lake                                                   | p = 0    | p = 0    | p = 0    | p > 0.05 |
|                                    |                                                       | Marine                                                 | p = 0    | p = 0    | p = 0    | p = 0    |
|                                    |                                                       | Playa                                                  | p = 0    | p = 0    | p > 0.05 | p > 0.05 |
|                                    |                                                       | Wetlands                                               | p = 0    | p = 0    | p > 0.05 | p > 0.05 |
|                                    |                                                       | 1 <sup>st</sup> order delta                            | p = 0    | p > 0.05 | p = 0    | p = 0    |
|                                    |                                                       | 1 <sup>st</sup> order fluvial fan                      | p = 0    | p = 0    |          |          |
|                                    | 2 <sup>nd</sup> order delta                           | p = 0                                                  | p = 0    | p > 0.05 | p = 0    |          |
|                                    | 2 <sup>nd</sup> order fluvial fan                     | p = 0                                                  | p = 0    |          |          |          |
|                                    | 3 <sup>rd</sup> order delta                           | p = 0                                                  | p = 0    | p = 0    | p = 0    |          |
|                                    | 3 <sup>rd</sup> order fluvial fan                     | p = 0                                                  | p = 0    |          |          |          |
|                                    | 4 <sup>th</sup> order delta                           | p = 0                                                  | p = 0    | p = 0    | p = 0    |          |
|                                    | 4 <sup>th</sup> order fluvial fan                     | p = 0                                                  | p = 0    |          |          |          |
|                                    | 5 <sup>th</sup> order delta                           | p = 0                                                  | p = 0    | p = 0    | p = 0    |          |
|                                    | 5 <sup>th</sup> order fluvial fan                     | p = 0                                                  | p = 0    |          |          |          |
|                                    | 6 <sup>th</sup> order delta                           | p = 0                                                  | p = 0    | p = 0    | p = 0    |          |
|                                    | 6 <sup>th</sup> order fluvial fan                     | p = 0                                                  | p = 0    |          |          |          |
|                                    | 7 <sup>th</sup> order delta                           | p = 0                                                  | p = 0    | p > 0.05 | p = 0    |          |
|                                    | 7 <sup>th</sup> order fluvial fan                     | p = 0                                                  | p > 0.05 |          |          |          |
|                                    | 8 <sup>th</sup> order delta                           | p = 0                                                  | p = 0    | p > 0.05 | p = 0    |          |
|                                    | 8 <sup>th</sup> order fluvial fan                     | p = 0                                                  | p = 0    |          |          |          |
|                                    | 9 <sup>th</sup> order delta                           | p = 0                                                  | p = 0    | p > 0.05 | p > 0.05 |          |
|                                    | 9 <sup>th</sup> order fluvial fan                     | p = 0                                                  | p = 0    |          |          |          |
|                                    | 10 <sup>th</sup> order delta                          | <i>Omitted due to low sample size (n = 15 &lt; 30)</i> |          |          |          |          |
|                                    | 10 <sup>th</sup> order fluvial fan                    | <i>Omitted due to low sample size (n = 13 &lt; 30)</i> |          |          |          |          |
| 11 <sup>th</sup> order delta       | <i>Omitted due to low sample size (n = 6 &lt; 30)</i> |                                                        |          |          |          |          |
| 11 <sup>th</sup> order fluvial fan | <i>Omitted due to lack of recorded data.</i>          |                                                        |          |          |          |          |

Supplemental Information

Supplementary Figure 1: Average network angle and length of landform.

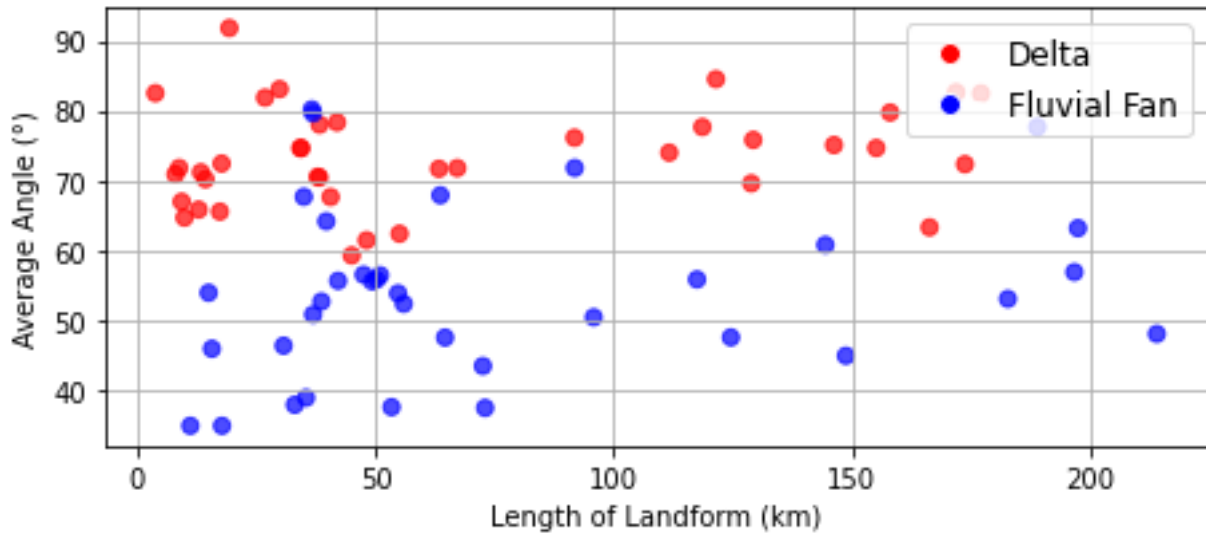

Supplementary Figure 2: Average network angle and slope for fluvial fans.

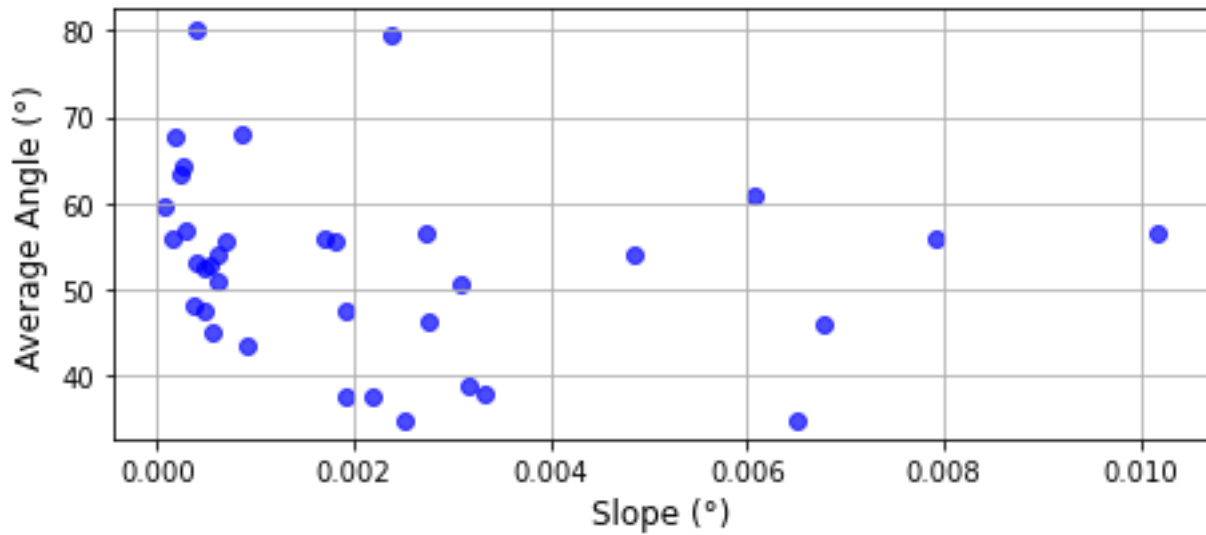

## Supplemental Information

Supplementary Figure 3: Normalized channel widths and lengths by order for deltas grouped by process regime and fluvial fans grouped by termination type.

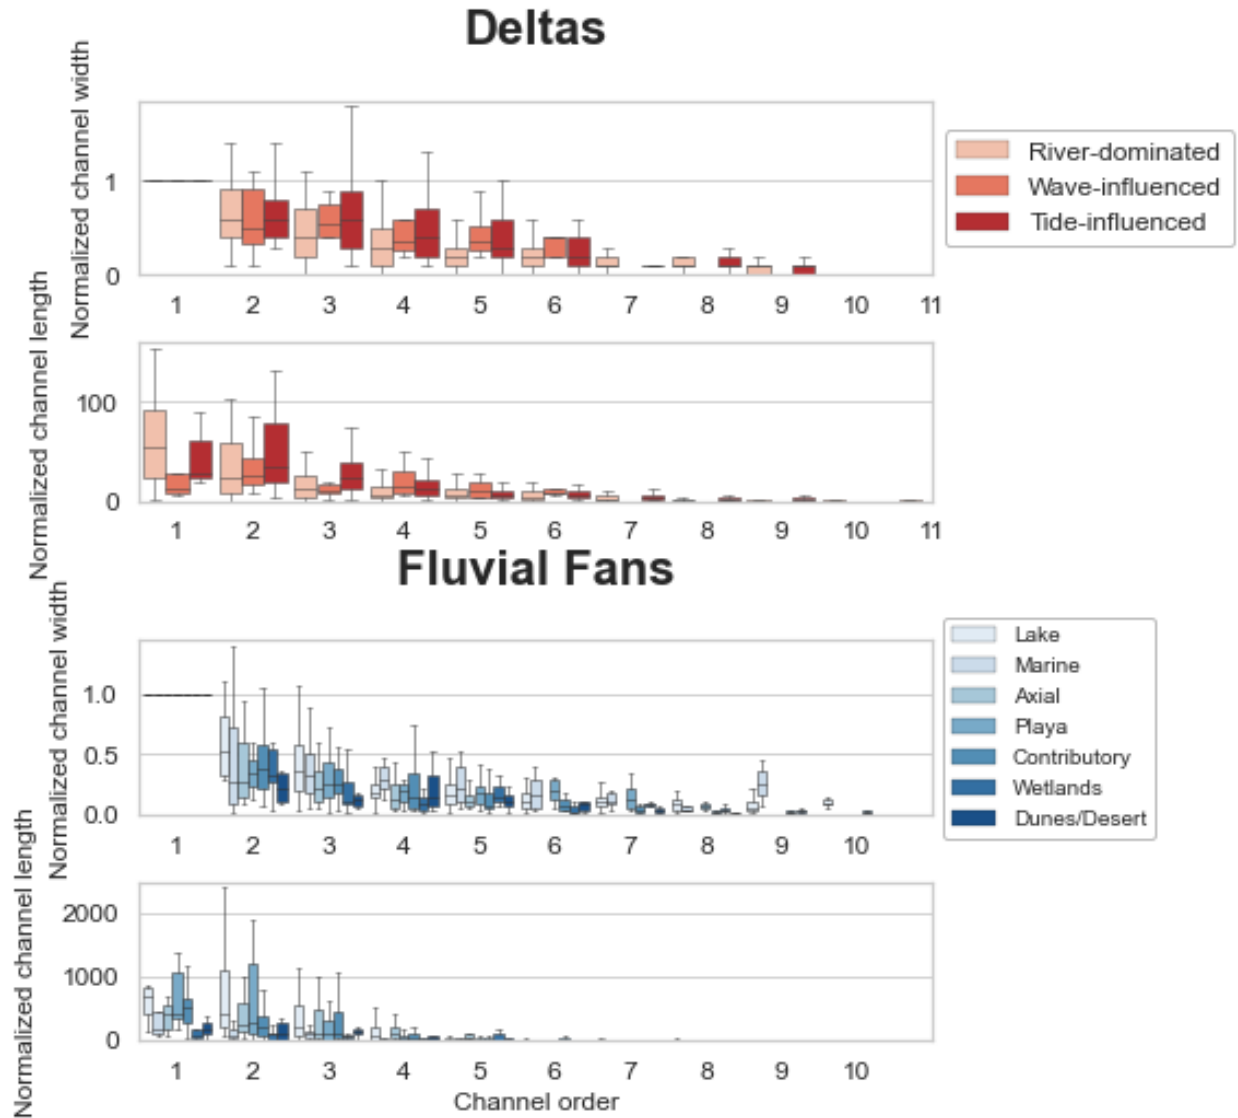

Supplemental Information

Supplementary Figure 4: Comparison of local angle measurement ( $\theta_l = 102^\circ$ ) against channel reach-scale angle measurement ( $\theta_r = 42^\circ$ ). Base imagery from Esri's World Imagery basemap (© Esri, Maxar, Earthstar Geographics, and the GIS User Community).

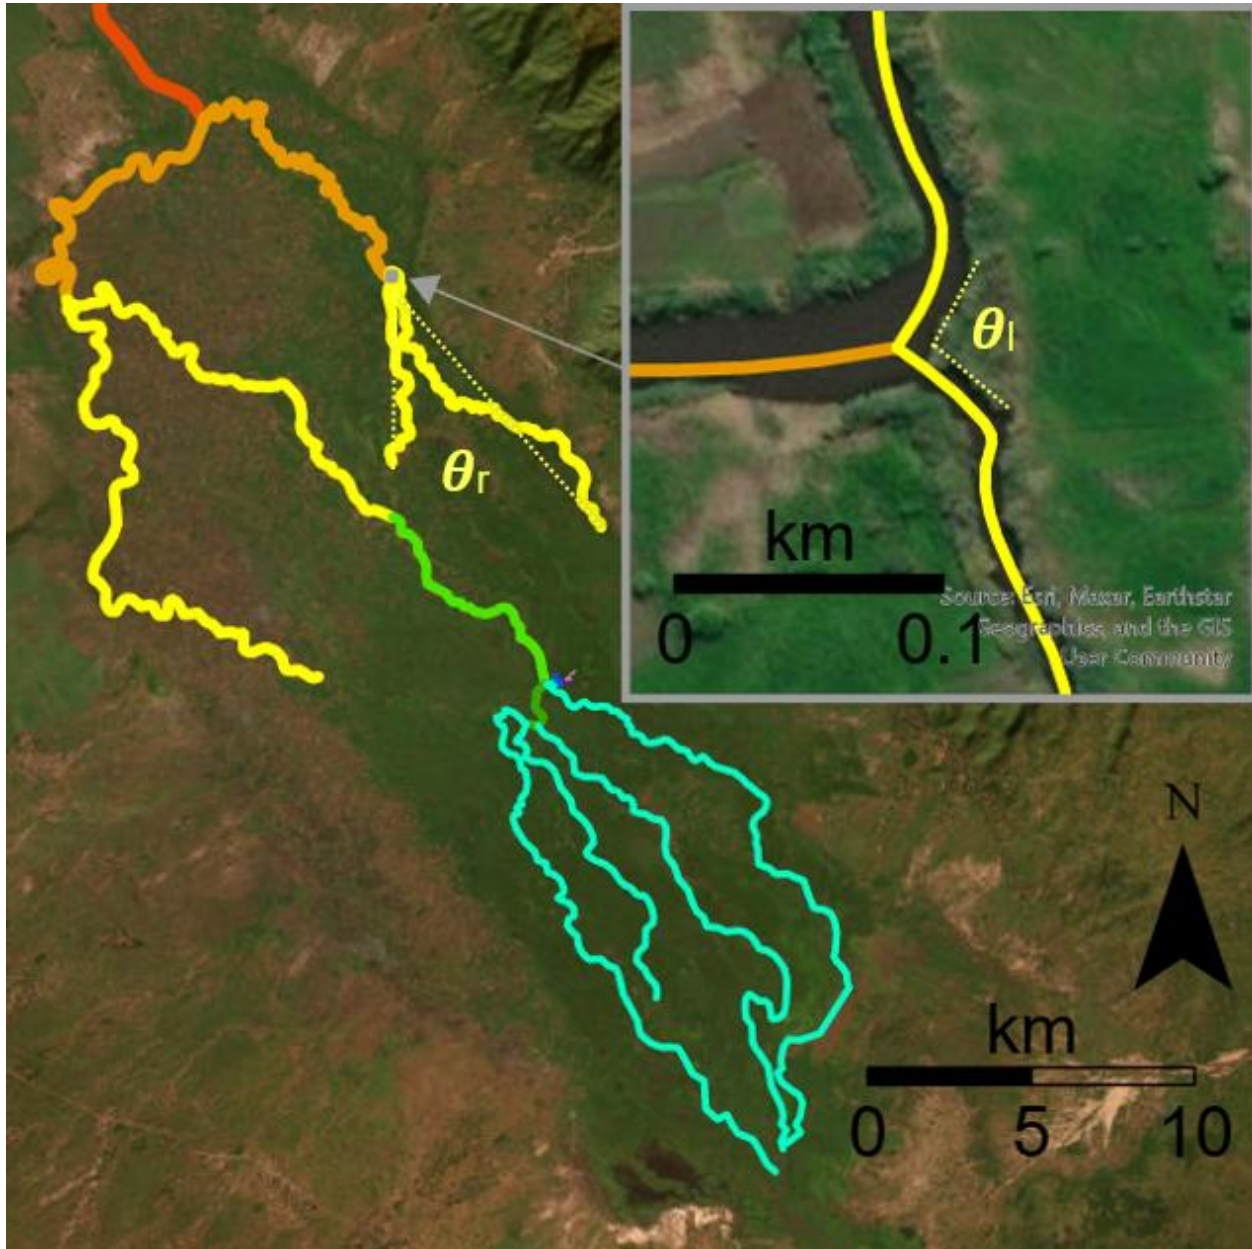

Supplement: Supplementary file 1 [file egusphere-2025-2497-supplement.pdf]
